# Supplementary material
Source: MDPI journal article supplement (https://www.mdpi.com/2673-6772/1/4/23)
Supplement: s1 [file s1]

Archive with 1 entries (1 files):
- parasitologia-1359727-supplementary.pdf
