# Supplementary material
Source: MDPI journal article supplement (https://www.mdpi.com/2673-6772/1/4/23)
Supplement: s1 [file s1 › parasitologia-1359727-supplementary.pdf]

Afraa *et al.* Supplementary Figure S1.

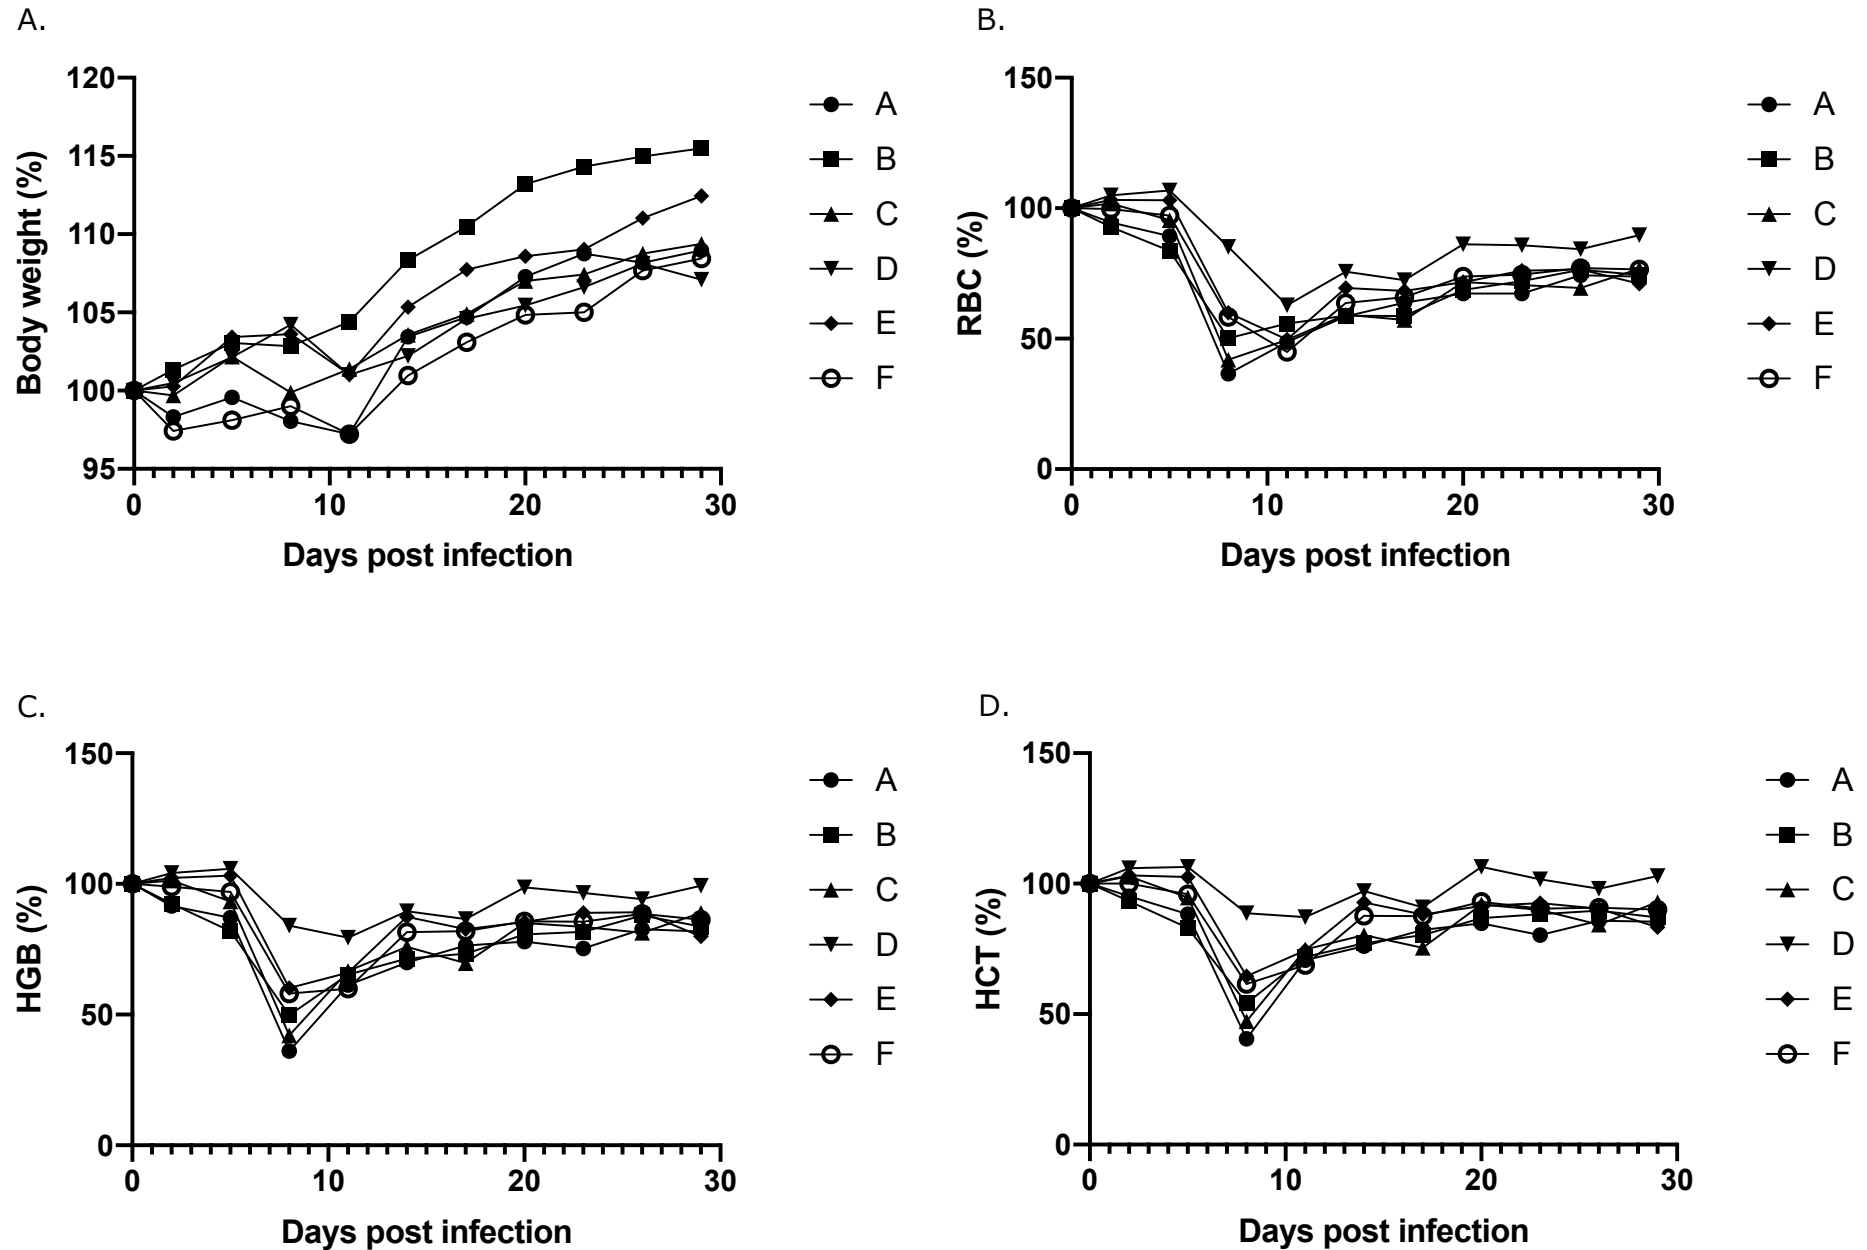

**Supplementary Figure S1.** Effects of ALA/SFC treatments to moderate body weight loss and anemia in mice infected with *Babesia microti*. Mice were infected with *B. microti* and orally administered the compounds for 30 days post infection (dpi). Five mice were used for each experimental group, and they were treated with PBS (control group) (A), 10 mg/kg SFC (B), 100 mg/kg ALA (C), 4 mg/kg ALA plus 0.4 mg/kg SFC (D), 20 mg/kg ALA plus 2 mg/kg SFC (E), or 100 mg/kg ALA plus 10 mg/kg SFC (F). Body weight, red blood cell count (RBC), hemoglobin value (HGB), and hematocrit percentage (HCT) were monitored at day 0 and then every 3 days from 3 dpi. Each parameter was measured in triplicate, and the mean value was calculated. Each plot represents the percentage to 0 dpi. The dpi when a significant difference was observed between PBS (control group) and the other experimental groups are summarized in Table 1.
